# Supplementary material for: Structural characterization and magnetic property studies of a mixed-valence {CoIIICoII4} complex with a μ4-oxo tetrahedral {CoII4} motif
Source: Royal Society of Chemistry journal article supplement (doi:10.1039/c9dt03561c), 2019-12-23
Supplement: c9dt03561c1.pdf [file c9dt03561c1.pdf]

## Supplementary Information

### **Structural characterization and magnetic properties studies of a mixed-valence $\{\text{Co}^{\text{III}}\text{Co}^{\text{II}}_4\}$ complex with a $\mu_4$ -oxo tetrahedral $\{\text{Co}^{\text{II}}_4\}$ motif**

**Guillermo Fiorini<sup>[a]</sup>, Luca Carrella<sup>[b]</sup>, Eva Rentschler<sup>[b]</sup> and Pablo Alborés<sup>[a]\*</sup>**

[a] Departamento de Química Inorgánica, Analítica y Química Física/ INQUIMAE (CONICET), Facultad de Ciencias Exactas y Naturales Universidad de Buenos Aires, Pabellón 2, Ciudad Universitaria, C1428EHA Buenos Aires, Argentina  
Fax: +5411 / 4576-3341  
E-mail: albores@qi.fcen.uba.ar

[b] Johannes Gutenberg University Mainz Chemistry, Institute of Inorganic and Analytical Chemistry, Duesbergweg 10-12, 55128 Mainz, Germany.

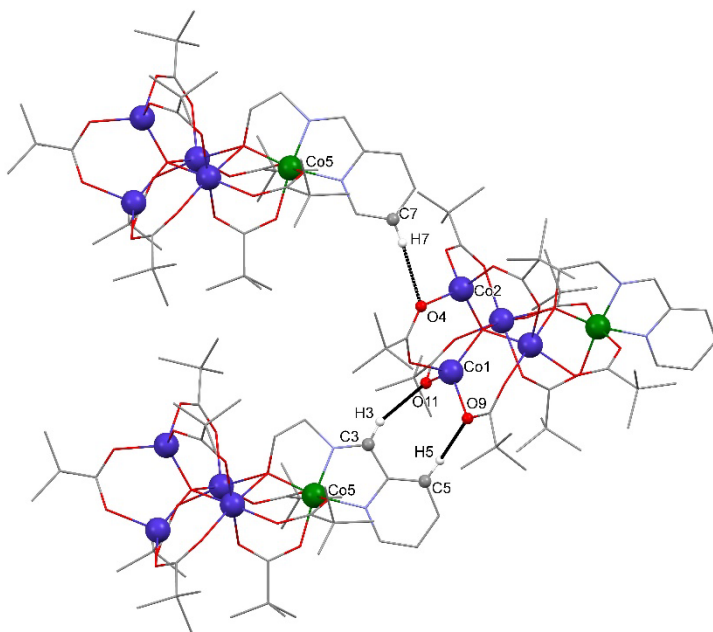

**Figure SI1.** Capped sticks molecular representation of complex **1** showing the C-H $\cdots$ O inter-molecular interactions pattern. H atoms have been removed for sake of clarity, except for the H atoms involved in the interactions. Colour code: Green: Co(III); Blue: Co(II); Red: O; Light Blue: N; Grey: C; White: H.

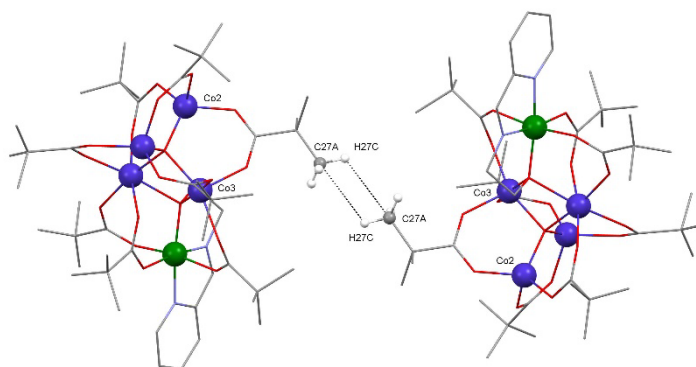

**Figure SI2.** Capped sticks molecular representation of complex **1** showing the C-H $\cdots$ C-H pivalates inter-molecular interactions pattern. H atoms have been removed for sake of clarity, except for the H atoms involved in the interactions. Colour code: Green: Co(III); Blue: Co(II); Red: O; Light Blue: N; Grey: C; White: H.

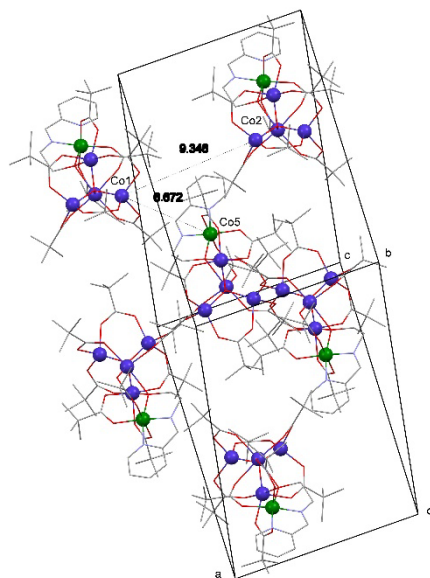

**Figure SI3.** Capped sticks molecular representation of complex **1** crystal packing showing the closest Co $\cdots$ Co inter-molecular distances (Å). H atoms have been removed for sake of clarity. Colour code: Green: Co(III); Blue: Co(II); Red: O; Light Blue: N; Grey: C.

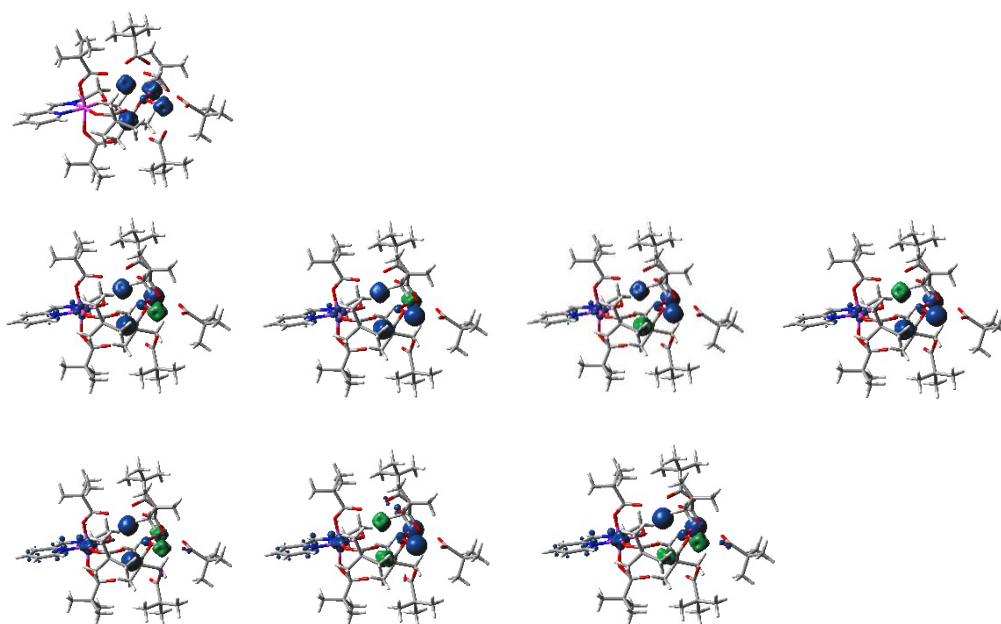

**Figure SI4.** Spin density iso-surfaces (0.02 a.u.), as arising from BS calculations of complex **1** (see details in text). Top: HS state; Middle: BS states converged after sequentially flipping each Co(II) site spin density; Bottom: BS states converged after sequentially flipping three Co(II)-Co(II) sites pair spin density.

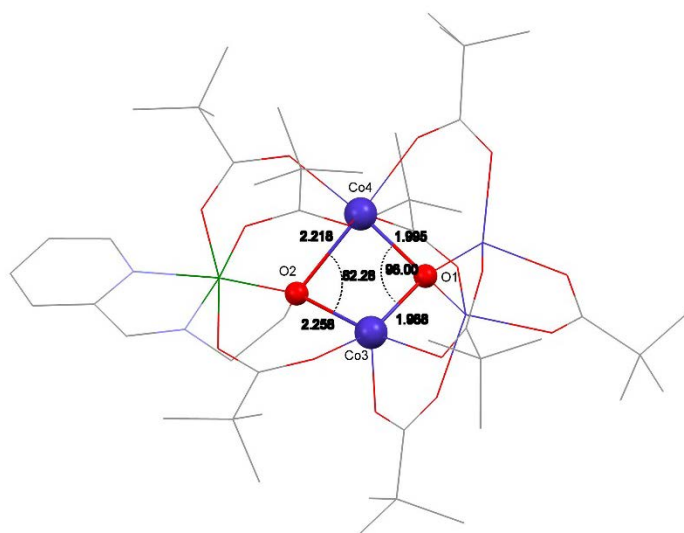

**Figure SI5.** Main metrics describing the Co(3)-Co(4) exchange interaction pathway in complex **1**. Angles in degrees, distances in Å.

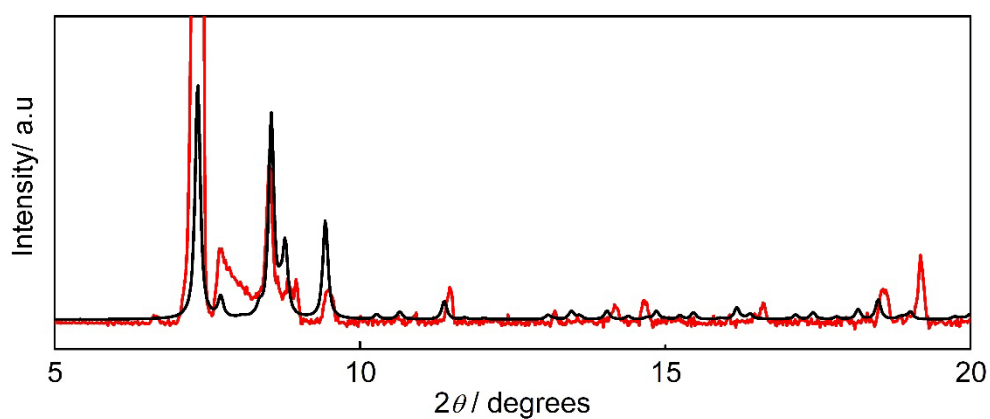

**Figure SI6.** Powder X-ray diffractogram collected at room temperature of polycrystalline sample of complex **1**. Red line: experimental; Black line: simulated from single crystal structural information.
